# Supplementary material for: Real‐life data on treatment and outcomes in advanced ovarian cancer: An observational, multinational cohort study (RESPONSE trial)
Source: PubMed Central journal article supplement — Cancer. 2022 Jun 17;128(16):3080–9. doi: 10.1002/cncr.34350 (PMC9545328; doi:10.1002/cncr.34350), 2022-06-17

**Supplementary material to:**

**Real-Life Data on Treatment and Outcomes in Advanced Ovarian Cancer: An Observational Multinational Cohort Study (RESPONSE Trial)**

Marth C, Abreu MH, Andersen KK, et al.

**SUPPLEMENTARY TABLE 1. Effect of bevacizumab on overall survival and progression-free survival, adjusting for confounders**

| <b>Confounder</b>                | <b>HR</b> | <b>Lower 95%<br/>confidence limit</b> | <b>Upper 95%<br/>confidence limit</b> | <b>P value</b> |
|----------------------------------|-----------|---------------------------------------|---------------------------------------|----------------|
| <b>Bevacizumab effect on OS</b>  | 0.62      | 0.42                                  | 0.91                                  | 0.01           |
| <b>Bevacizumab effect on PFS</b> | 1.03      | 0.82                                  | 1.30                                  | 0.79           |
| <b>BRCAm effect on OS</b>        | 0.69      | 0.35                                  | 1.35                                  | 0.28           |
| <b>BRCAm effect on PFS</b>       | 0.60      | 0.41                                  | 0.84                                  | <0.01          |

Abbreviations: BRCAm, *BRCA1* and/or *BRCA2* mutation; HR, hazard ratio; OS, overall survival; PFS, progression-free survival.

All analyses are adjusted by age (continuous and linear), country, stage, and indication of good prognosis, defined as primary surgery and no visual residual disease.

**SUPPLEMENTARY FIGURE 1. Patients (n) by year of diagnosis (index date)**

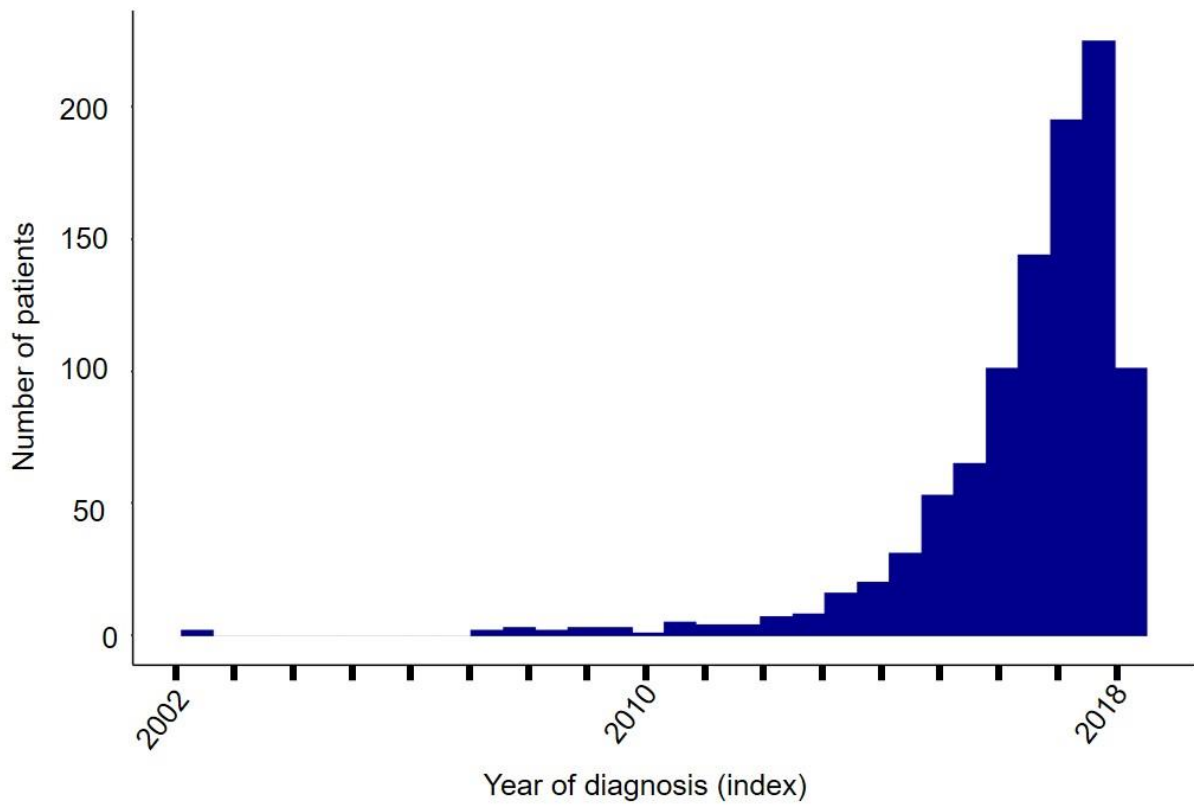

Supplement: CNCR-128-3080-s001.pdf [file CNCR-128-3080-s001.pdf]
